# Supplementary material for: Strongly Bound Frenkel Excitons on TiO2 Nanoparticles: An Evolutionary and DFT Approach
Source: Hindawi journal article supplement (doi:10.1155/2024/4014216), 2024-02-21
Supplement: f1 [file 4014216.f1.docx]

**Supplementary Material**

**Strongly bound Frenkel excitons on TiO2 nanoparticles: An Evolutionary and DFT approach**

Oscar Olvera-Neria,* Raúl García-Cruz, Julio Gonzalez-Torres, Luz María García-Cruz, Jean Luis Castillo-Sánchez, and Enrique Poulain

Applied Molecular Atomic Physics Area (FAMA), CBI, Universidad Autónoma Metropolitana Azcapotzalco, Av. San Pablo 420, Col. Nueva El Rosario, Mexico City, 02128, Mexico

Corresponding author:

*Oscar Olvera-Neria. E-mail: oon@azc.uam.mx. Telephone: +52 55 53189505.

**1. Performance of the evolutionary algorithm**

**Table S1** Statistics for each (TiO2)*n* NPs using the PM6-D3 model implemented in MOPAC as a structural optimizer and the USPEX program.

| Cluster size, *n* | Generation where the global minimum is located | Number of structures until the global minimum is found | Total  calculated structures | Global minimum generated by Variation operator |
| --- | --- | --- | --- | --- |
| 2 | 1 | 8 | 2453 | Random |
| 3 | 23 | 787 | 1262 | Random |
| 4 | 1 | 35 | 3136 | Random |
| 5 | 5 | 178 | 3477 | Soft mutation |
| 6 | 3 | 90 | 3476 | Permutation |
| 7 | 24 | 815 | 3472 | Heredity |
| 8 | 10 | 318 | 3424 | Heredity |
| 9 | 55 | 1900 | 3470 | Heredity |
| 10 | 20 | 698 | 3478 | Random |
| 11 | 9 | 304 | 3471 | Heredity |
| 12 | 42 | 1432 | 3432 | Heredity |
| 13 | 33 | 1116 | 3444 | Soft mutation |
| 14 | 100 | 3401 | 3428 | Soft mutation |
| 15 | 63 | 2118 | 3386 | Heredity |
| 16 | 48 | 1606 | 3369 | Soft mutation |
| 17 | 15 | 491 | 3317 | Random |
| 18 | 75 | 2443 | 3264 | Random |
| 19 | 92 | 2919 | 3185 | Heredity |
| 20 | 51 | 1590 | 3184 | Heredity |

**2. Structural characteristics of amorphous TiO2 NPs**

**Figure S1** Coordination number of (TiO2)*n* NPs with *n* = 18, 19, and 20. (**a**) Coordination number of Ti. (**b**) Coordination number of O. Vertical lines represent the corresponding values in bulk anatase (shown in relative magnitudes).


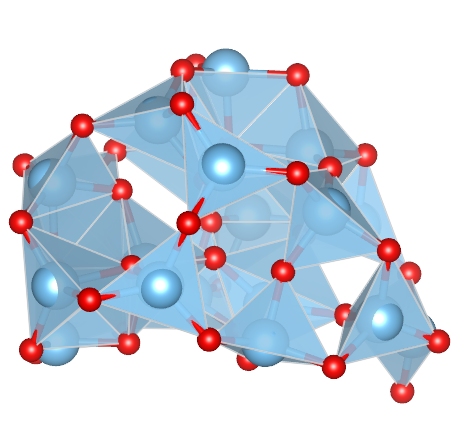

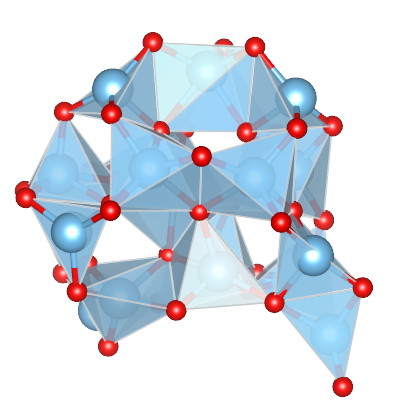

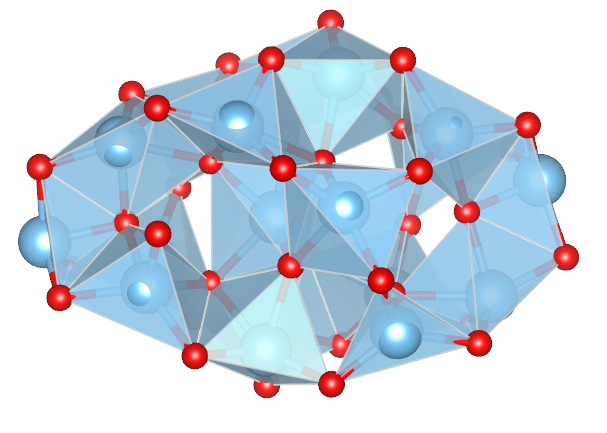


**a)**

**b)**

**c)**

**Figure S2** Polyhedra of TiO2 NPs. (**a**) (TiO2)20, (**b**) (TiO2)19, (**c**) (TiO2)18.

**Figure S3** XRD pattern of the amorphous (TiO2)20 NPs. The structure was obtained with the PBE0/def2-TZVP level of theory. Diffraction data (in relative intensities) for anatase (Ref. [1]) and rutile (Ref. [2]) are shown for comparison.

**Figure S4** The diameter and density of (TiO2)*n* NPs.

**Figure S5** Ionization potential (*IP*) and electron affinity (*EA*) of TiO2 NPs obtained at the PBE0/def2-TZVP level of theory.

**Figure S6** UV-vis absorption spectra of (TiO2)*n* NPs with *n* = 5–14. Vertical lines represent the corresponding lowest transitions from the ground state (S0) to excited states S1 to S5 (shown in relative magnitudes).

**3. Band structure of anatase and rutile (TiO2 crystal phases)**

The band structure calculations of anatase and rutile were performed with the VASP5.4.1 program [3]. The projector-augmented wave (PAW) approach describes the ion-electron interactions. The calculations employed the plane-wave basis for Ti and O with an energy cutoff of 560 eV. The *k*-point meshes of 9×9×9 and 9×9×11 were used for the anatase and rutile phases, respectively. The total energy convergence criterion was 10−6 eV.

Anatase TiO2 has a tetragonal structure, *I*41/amd (141) space group, with lattice parameters at 298 K: *a* = 3.7842 Å, *c* = 9.5146 Å, and *γ* = 90° [1]. Rutile TiO2 also has a tetragonal structure but with *P*42/mnm (136) space group and lattice parameters at 300 K: *a* = 4.5922, *b* = 2.9574, and *γ* = 90° [2].


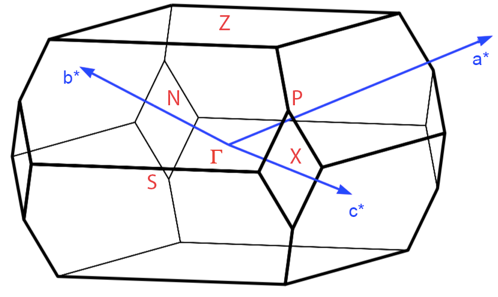

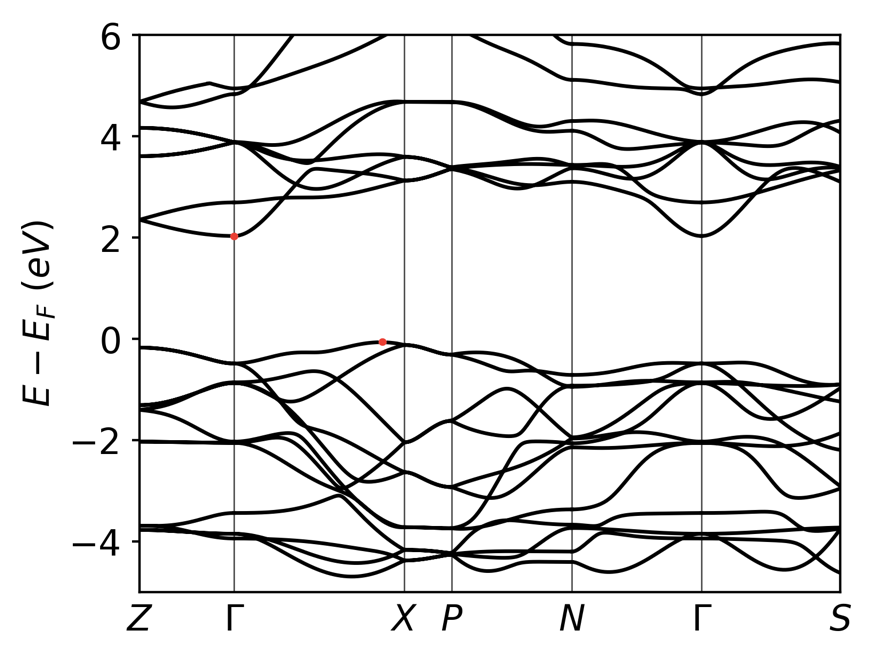


**a)**

**b)**

**Figure S7** (**a)** Band structure calculation of anatase TiO2 using the PBE functional. Red circle dots indicate the VCM and the CBM. (**b)** Representation of the 3D Brillouin zone of anatase TiO2.

Figure S7(a) shows the band structure of anatase TiO2 calculated with the PBE functional. The anatase presents an indirect band gap of 2.1 eV observed between the conduction band minimum (CBM) at Γ point and the valence band maximum (VBM) along with the Γ–X direction. The experimental band gap is 3.2 eV [4]. This severe underestimation of the band gap from density functional theory (DFT) with gradient-corrected exchange-correlation potentials is known. According to Perdew, standard DFT calculations underestimate the band gap because of its difficulty in representing empty states [5]. Illas *et al*. [6] showed a linear correlation between the electronic band gaps obtained from standard DFT and GW approaches:

*E*gap(G0W0) = 1.358·*E*gap(PBE) + 0.904 (1)

We obtain an overestimated band gap of 3.756 eV using Eq. 1.

In Figure S8(a) is shown the band structure of rutile TiO2 calculated with the PBE functional. The path to calculate the band structure is also reported, Figure S8(b). The rutile TiO2 belongs to the direct band gap semiconductor category with a calculated value of 1.83 eV at gamma point. The estimated band gap with Eq. (1) is 3.389 eV, in partial agreement with the experimental value of 3.0 eV [4].


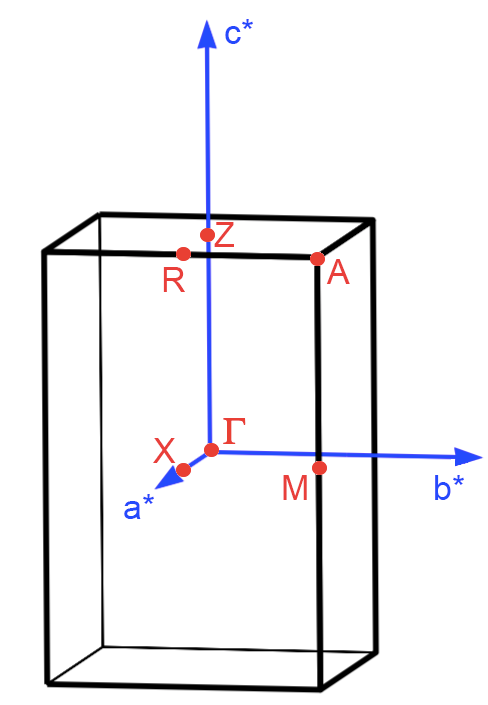


**a)**

**b)**


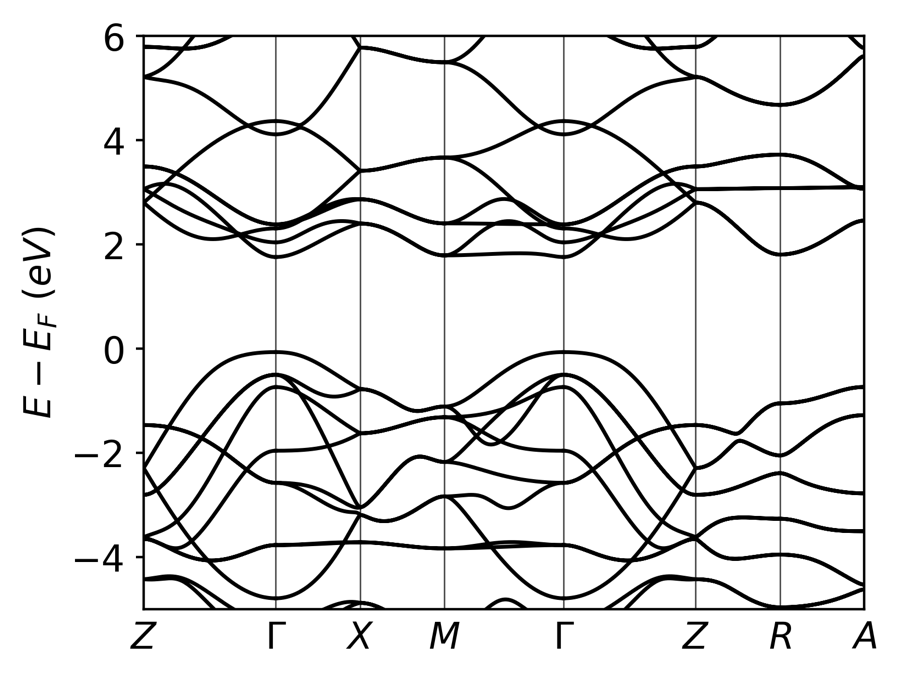


**Figure S8** (**a**) Band structure calculation of rutile TiO2 using the PBE functional. (**b**)Representation of the 3D Brillouin zone of rutile TiO2.

**References**

1. M. Horn, C.F. Schwebdtfeger, and E. P. Meagher, "Refinement of the structure of anatase at several temperatures*," *Zeitschrift für Kristallographie*, vol. 136, no. 3-4, pp. 273-281, 1972.

2. R. J. Swope, J. R. Smyth, and A. C. Larson, "H in rutile-type compounds: I. Single-crystal neutron and X-ray diffraction study of H in rutile," *American Mineralogist*, vol. 80, no. 5-6, pp. 448-453, 1995.

3. G. Kresse, and J. Furthmüller, "Efficiency of ab-initio total energy calculations for metals and semiconductors using a plane-wave basis set," *Computational Materials Science*, vol. 6, no. 1, pp. 15-50, 1996.

4. L. Kavan, M. Grätzel, S. E. Gilbert, C. Klemenz, and H. J. Scheel, "Electrochemical and Photoelectrochemical Investigation of Single-Crystal Anatase," *Journal of the American Chemical Society*, vol. 118, no. 28, pp. 6716-6723, 1996.

5. J. P. Perdew, "Density functional theory and the band gap problem," *International Journal of Quantum Chemistry*, vol. 28, no. S19, pp. 497-523, 1985.

6. Á. Morales-García, R. Valero, and F. Illas, "An Empirical, yet Practical Way To Predict the Band Gap in Solids by Using Density Functional Band Structure Calculations," *The Journal of Physical Chemistry C*, vol. 121, no. 34, pp. 18862-18866, 2017.
